# Supplementary material
Source: PubMed Central journal article supplement (PMC6528275)
Supplement: cb9b00222_si_001.pdf [file cb9b00222_si_001.pdf]

## Supporting information

### Mitochondrial Protease ClpP is a Target for the Anticancer Compounds ONC201 and Related Analogs

Paul R. Graves<sup>1Ψ</sup>, Lucas J. Aponte-Collazo<sup>2Ψ</sup>, Emily M. J. Fennell<sup>2Ψ</sup>, Adam C. Graves<sup>2</sup>, Andrew E. Hale<sup>4</sup>, Nedyalka Dicheva<sup>2</sup>, Laura E. Herring<sup>2</sup>, Thomas S. K. Gilbert<sup>2</sup>, Michael P. East<sup>2</sup>, Ian M. McDonald<sup>2</sup>, Matthew R. Lockett<sup>3</sup>, Hani Ashamalla<sup>1</sup>, Nathaniel J. Moorman<sup>4</sup>, Donald S. Karanewsky<sup>5</sup>, Edwin J. Iwanowicz<sup>5</sup>, Ekhsan Holmuhamedov<sup>6</sup>, and Lee M. Graves<sup>2\*</sup>

#### Table of content:

Supplemental Methods

Figure 1 - Distinct signaling effects of ONC201 and TR-57 in SUM159 cells

Figure 2 - Ability of TR-57, but not D9 and ADEP to compete for ClpP binding

Figure 3 - ATF4 induction by ONC201 and TR-57 is prevented by ClpP knockdown

Figure 4 - Effects of D9 are prevented by ClpP knockdown in SUM159 cells

Table 1 - Identification of ClpP through PID analysis

#### Supplemental Methods

##### Methods for ClpP siRNA

Approximately  $5 \times 10^4$  SUM159 cells were seeded in 6-well plates. The following day, cells were mock transfected or transfected with Dharmacon siGENOME human ClpP (8192) siRNA (GAAGGAGCCUGUAGAAGCA) at a final concentration of 33 nM according to the standard Dharmacon protocol. Dharmafect was used at a dilution of 1:50. Cells were incubated with siRNA for 48 hrs and then an additional 24 hrs in the presence of drug before harvesting.

##### Synthetic Chemistry

The compounds were prepared as given in the following references: <sup>1-3</sup>. For additional clarity we have provided synthetic details below for TR79, TR80 and TR81. 2-(3-iodopropyl) isoindoline-1, 3-dione is available from multiple vendors including Sigma-Aldrich (Aldrich CPR-R465674). In addition, 2-(4-iodobutyl) isoindoline-1, 3-dione is also available from multiple vendors including Sigma-Aldrich (Aldrich CPR-R260312)

##### **Example 1**

Synthesis of compound TR79

3-((1-(3-aminopropyl)-2,4-dioxo-3-(4-(trifluoromethyl)benzyl)-1,2,3,4,7,8-hexahydropyrido[4,3-d]pyrimidin-6(5H)-yl)methyl)benzotrile

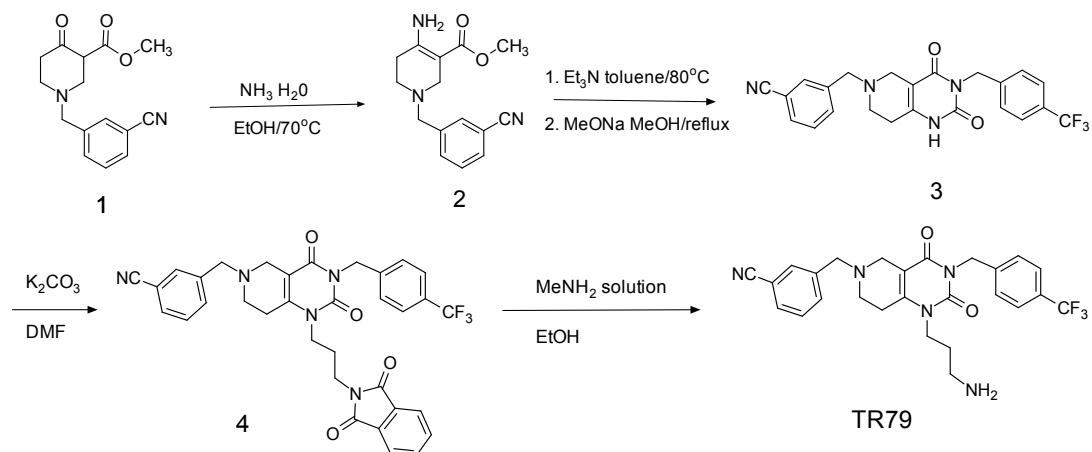

Step 1 : A mixture of 1-(3-cyanobenzyl)-4-oxopiperidine-3-carboxylate **1** (8.55 g, 31.4 mmol), and ammonia solution (7 ml, 25%) in ethanol (110 ml) was heated at 70°C for 5 h. The solution was concentrated, extracted with DCM (2 X 300 ml) and washed with brine. The extracts were dried over Na<sub>2</sub>SO<sub>4</sub> and evaporated under reduced pressure to give 8 g of 2-((4-amino-3-(methoxycarbonyl)-5,6-dihydropyridin-1(2H)-yl)methyl)-4-cyanobenzonitrile **2** (oil), which was directly used for next step.

Step 2: To a solution of 2-((4-amino-3-(methoxycarbonyl)-5,6-dihydropyridin-1(2H)-yl)methyl)-4-cyanobenzonitrile (**2**, 2 g, 7.4 mmol) in toluene 20 mL was added 1-(isocyanatomethyl)-4-(trifluoromethyl)benzene (1.6 g, 7.5 mmol) and triethylamine (1.1 g, 10.4 mmol). The solution was heated to 80°C for 8 h. The reaction solution was cooled to rt and concentrated *in vacuo*. The formed white solid was filtered and dissolved in MeOH (20 ml). NaOMe (350 mg) was added and the mixture was refluxed overnight. Then ca 10-15ml of methanol was removed and the precipitate was filtered. The desired product 3-((2,4-dioxo-3-(4-(trifluoromethyl)benzyl)-1,2,3,4,7,8-hexahydropyrido[4,3-d]pyrimidin-6(5H)-yl)methyl)benzonitrile (**3**) was obtained as a pale yellow solid (0.8 g, 25%).

Step 3 : To a solution of 3-((2,4-dioxo-3-(4-(trifluoromethyl)benzyl)-1,2,3,4,7,8-hexahydropyrido[4,3-d]pyrimidin-6(5H)-yl)methyl)benzonitrile (**3**, 200 mg) in DMF (2 ml) was added potassium carbonate (150 mg) and 2-(3-iodopropyl)isoindoline-1,3-dione (150 mg). The mixture was heated at 100°C for 12 h. Water (ca 3 ml) was added and the solution was extracted with EtOAc (3 X 5 ml). The combined extracts were washed with brine 3 times (ca 5 ml), dried over Na<sub>2</sub>SO<sub>4</sub>, filtered and concentrated *in vacuo* to yield the crude product. The purified product (**4**) was obtained by preparative TLC, 100 mg, Yield 35%.

Step 4 : To a solution of product (**4**) (100 mg) in EtOH (3 ml) was added methylamine solution (0.25 ml, 30%). The mixture was heated at 80°C for 4 h. The water was added and the solution was extracted with DCM (3 X 3 ml). The combined organic extracts were dried over Na<sub>2</sub>SO<sub>4</sub>, filtered and concentrated *in vacuo* to yield the crude product, **TR79**. The final product (**TR79**) was obtained by preparative HPLC, 15 mg, Yield 19%.

$^1\text{H}$ NMR (400MHz,  $\text{CD}_3\text{OD}$ ) 2.03 (t,  $J = 7.2\text{Hz}$ , 2H), 2.99 (t,  $J = 6.8\text{Hz}$ , 2H), 3.18 (s, 2H), 3.67 (s, 2H), 4.01 (t,  $J = 6.8\text{Hz}$ , 2H), 4.07 (s, 2H), 4.62 (s, 2H), 5.17 (s, 2H), 7.5-7.57 (m, 4H), 7.69 (t,  $J = 8\text{Hz}$ , 1H), 7.86-7.93 (m, 2H), 7.99 (s, 1H); LC-MS:  $m/z = 498.1(\text{M}+1)$ .

### Example 2

Synthesis of compound TR80

3-((1-(4-aminobutyl)-2,4-dioxo-3-(4-(trifluoromethyl)benzyl)-1,2,3,4,7,8-hexahydropyrido[4,3-d]pyrimidin-6(5H)-yl)methyl)benzonitrile

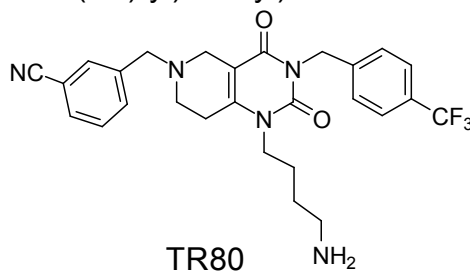

**TR80** is prepared in a similar fashion as example 1.  $^1\text{H}$ NMR (400MHz,  $\text{CD}_3\text{OD}$ ) 1.7 (s, 4H), 2.95 (s, 2H), 3.16 (s, 2H), 3.64 (s, 2H), 3.9 (s, 2H), 4.03 (s, 2H), 4.59 (s, 2H), 5.15 (s, 2H), 7.49-7.57 (m, 4H), 7.67-7.7 (m, 1H), 7.88 (t,  $J = 8\text{Hz}$ , 2H), 7.98 (s, 1H); LC-MS:  $m/z = 512.2(\text{M}+1)$ .

### Example 3

Synthesis of compound TR81:

3-((1-(4-aminobutyl)-3-(4-chlorobenzyl)-2,4-dioxo-1,2,3,4,7,8-hexahydropyrido[4,3-d]pyrimidin-6(5H)-yl)methyl)benzonitrile

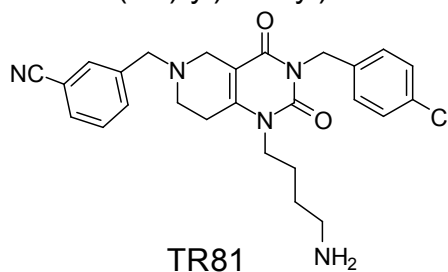

**TR81** is prepared in a similar fashion as example 1.

$^1\text{H}$ NMR (400MHz,  $\text{CD}_3\text{OD}$ ) 1.72 (s, 4H), 2.98-2.99 (d, 2H), 3.15-3.17 (d, 2H), 3.61 (t,  $J=5.6\text{Hz}$ , 2H), 3.91-3.93(d, 2H), 4.01 (s, 2H), 4.57 (s, 2H), 5.08 (s, 2H), 7.28-7.3 (d, 2H), 7.35-7.37 (d, 2H), 7.71 (t,  $J=7.6\text{Hz}$ , 1H), 7.9-7.92 (d, 2H), 7.99 (s, 1H).

### Prep HPLC conditions

|                   |                                  |       |       |
|-------------------|----------------------------------|-------|-------|
| Column:           | Waters T3 Prep C18, 5um 19*100mm |       |       |
| PREP              | Gilson 215                       |       |       |
| Mobile Phase(A) : | 0.1%FA/Water                     |       |       |
| Mobile Phase(B):  | Acetonitrile                     |       |       |
| Flow Rate:        | 20 mL/minute                     |       |       |
| Detection:        | 220 nm                           |       |       |
| Run Time:         | 12min                            |       |       |
| Injection Volume: | 100uL                            |       |       |
| Diluent:          | Methanol                         |       |       |
| Gradient          | Time                             | A (%) | B (%) |
|                   | 0.00                             | 90    | 10    |
|                   | 8.00                             | 50    | 50    |
|                   | 8.50                             | 5     | 95    |
|                   | 10.00                            | 5     | 95    |
|                   | 10.50                            | 90    | 10    |
|                   | 12.00                            | stop  |       |

### References

1. Xu, R. L., Y. , Imidazo-Pyrimidine Compounds, and Preparation Methods and Application Thereof. *Chinese Patent 104860948 2015*, 100.
2. Iwanowicz, E. J., Protein Kinase Regulators. *Patent Application WO2018/031987 2018*, 92.
3. Iwanowicz, E. J., Protein Kinase Regulators. *Patent Application WO2018/031990 2018*, 81.

**a**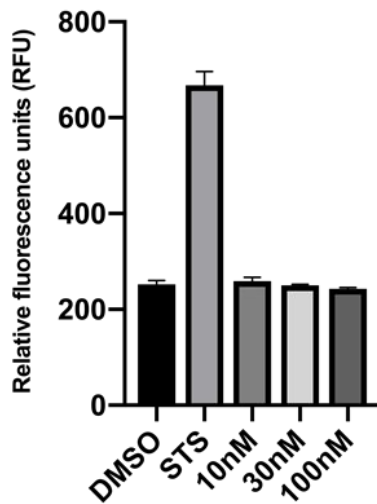**b**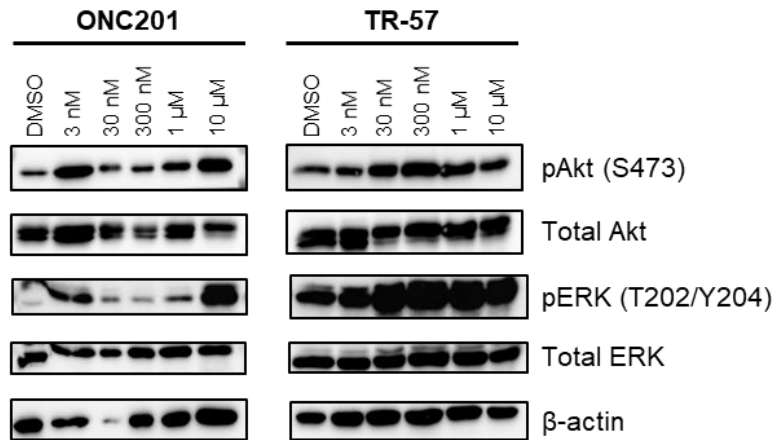

**Supplemental Figure 1. ONC201 and TR-57 do not activate caspase or inhibit Erk/AKT in SUM159 cells.** (a) Measurement of caspase 3/7 activity in SUM159 cells after 24-hour treatment with 20 nM staurosporine, 10, 30, or 100 nM of TR-57, or DMSO. Graphs shown are representative of 2 biological replicates. Error bars represent standard error of the mean (SEM) from replicates. (b) Immunoblot showing changes in phosphorylation of indicated proteins in SUM159 cells after treatment with either ONC201, TR-57, or DMSO for 24 hours.

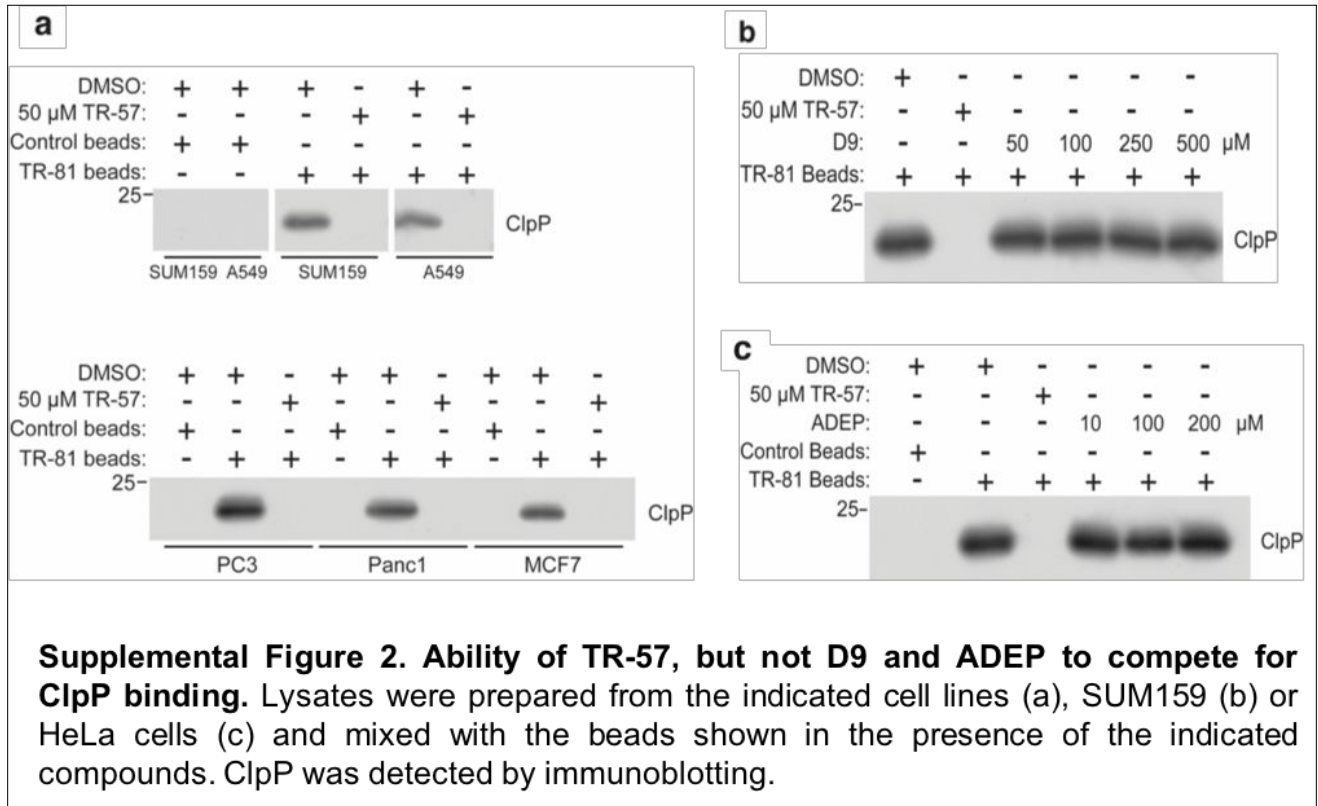

**a**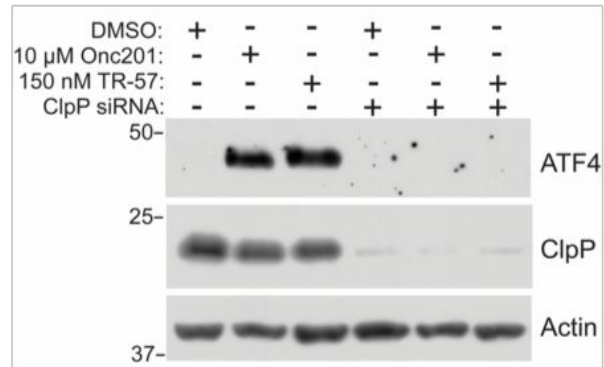

**Supplemental Figure 3. ATF4 induction by ONC201 and TR-57 is prevented by ClpP knockdown.** (a) SUM159 cells were mock or ClpP siRNA transfected and treated with DMSO, ONC201 or TR-57 for 24 hrs and immunoblotted for the indicated proteins. Blots shown are representative of 3 experiments in multiple cell lines.

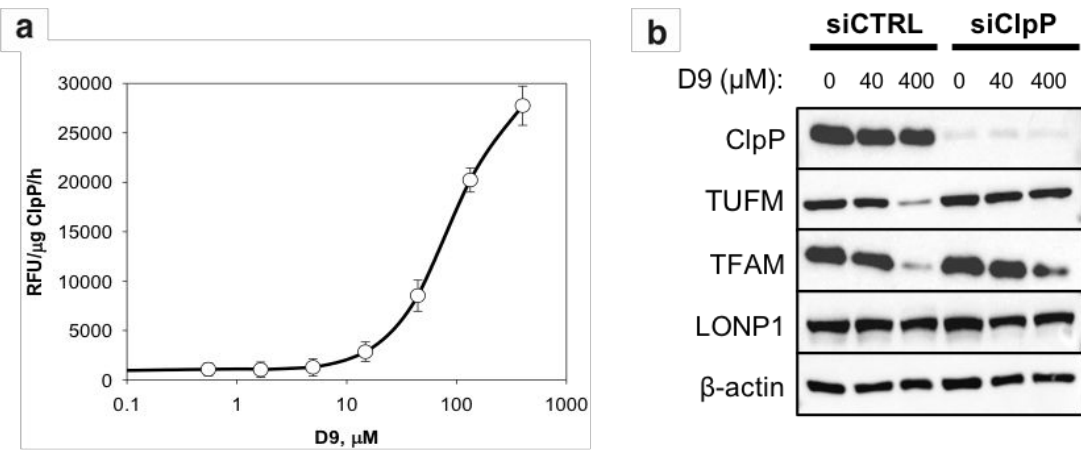

**Supplemental Figure 4. Effects of D9 are prevented by ClpP knockdown in SUM159 cells** (a) Purified, recombinant human ClpP was incubated with the indicated concentrations of D9 and ClpP peptidase activity was measured (b) Immunoblot of lysates from SUM159 cells transfected with siCTRL or siClpP, and treated with DMSO or D9 for 24 hours. Blots shown are representative of 3 biological replicates



| Protein Name                                                                               | Database Accession ID | MW (Da) | Peptide Count | Ion Score |
|--------------------------------------------------------------------------------------------|-----------------------|---------|---------------|-----------|
| <b>ATP-dependent Clp protease proteolytic subunit</b><br>OS=Homo sapiens GN=CLPP PE=1 SV=1 | CLPP_HUMAN            | 30161   | 8             | 435       |
| <b>Peroxiredoxin-1 (Fragment)</b> OS=Homo sapiens<br>GN=PRDX1 PE=1 SV=1                    | A0A0A0MSI0_HUMAN      | 18964   | 2             | 47        |

**Supplemental Table 1. Identification of ClpP through PID analysis** Mass spectrometry protein identification from HELA cell lysate after incubation with TR-80 beads and TR-57 elution.
